# Supplementary material
Source: bioRxiv or medRxiv preprint supplement (https://medrxiv.org/content/medrxiv/early/2022/02/10/2022.02.10.22270706/DC2/embed/media-2.pdf)
Supplement: Supplementary file [file media-2.pdf]

**Additional File II:**

**DRAFT DATA EXTRACTION FORM**

1. Year of publication
2. Country of publication for first and last authors
3. Investigated population(s)
  - a. Country/countries
  - b. Individuals/pairs/families?
  - c. Gender
  - d. Age
  - e. General/special risk (in terms of exposure)
4. Plastic exposures
5. Health outcome measures
6. Study design
7. Notes
